# Supplementary material for: The structural basis of tRNA recognition by arginyl-tRNA-protein transferase
Source: PubMed Central journal article supplement (PMC10115844; doi:10.1038/s41467-023-38004-8), 2023-04-19
Supplement: 41467_2023_38004_MOESM1_ESM.pdf [file 41467_2023_38004_MOESM1_ESM.pdf]

# Supplementary Figure 1

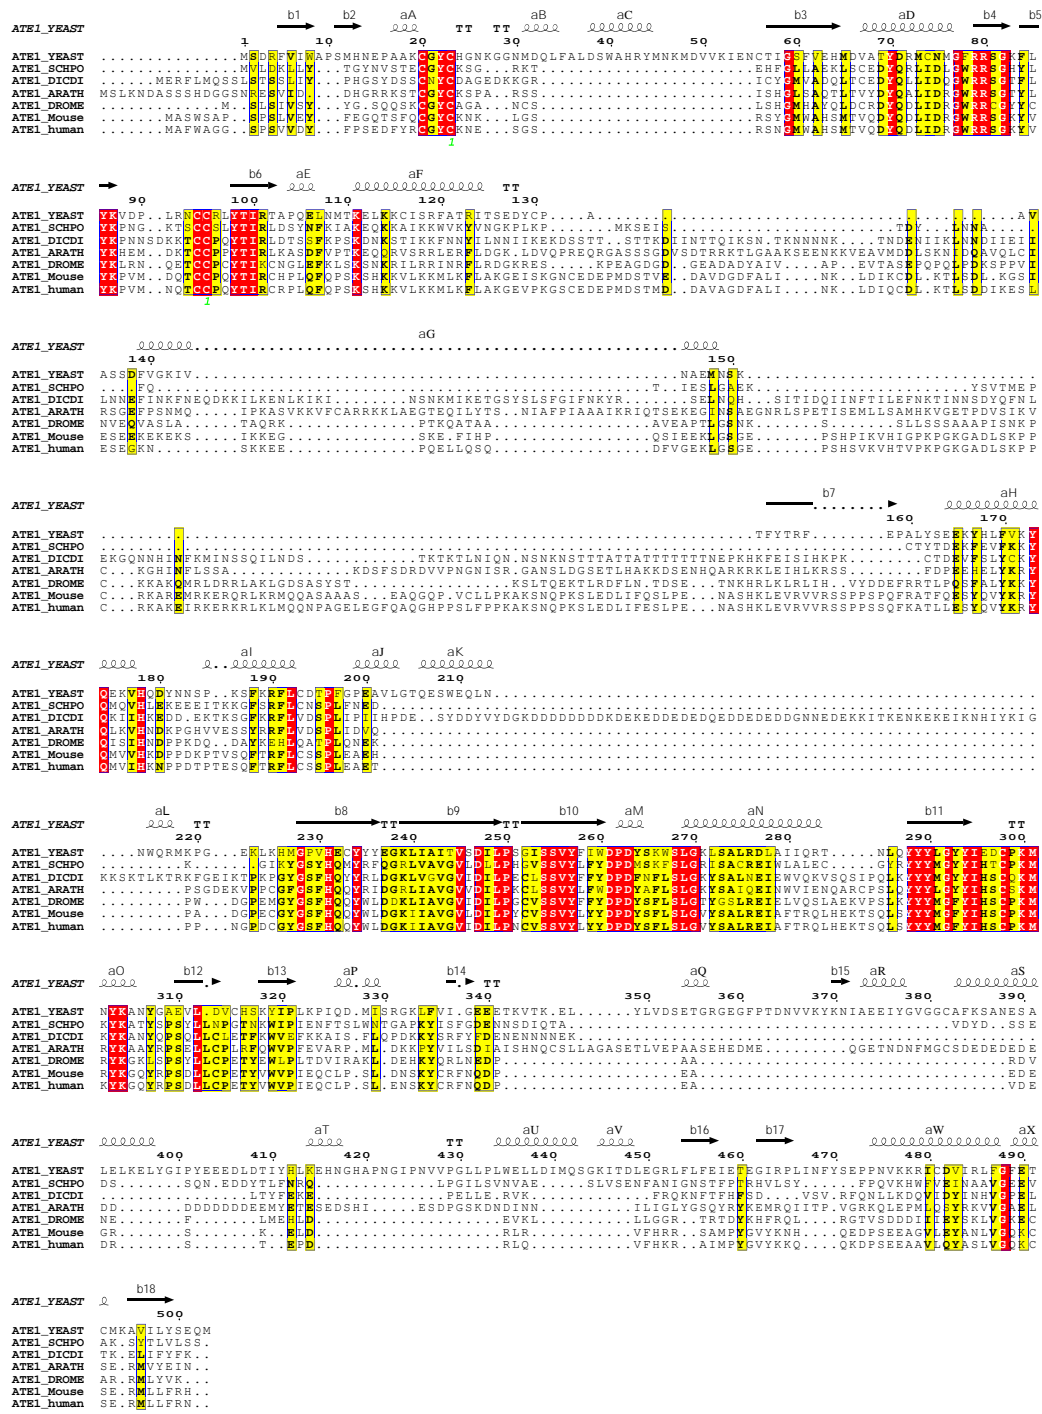

**Supplementary Figure 1.** Multiple sequence alignment of ATE1 sequences in Uniprot from model organisms (yeast, SCHPO, DICDI, ARATH, DROME, mouse, and human) using Clustal Omega and displayed using ESPrnt3. Arrows and spirals indicate β-strands and α-helices, respectively. Red and yellow backgrounds indicate identical and similar residue.

## Supplementary Figure 2

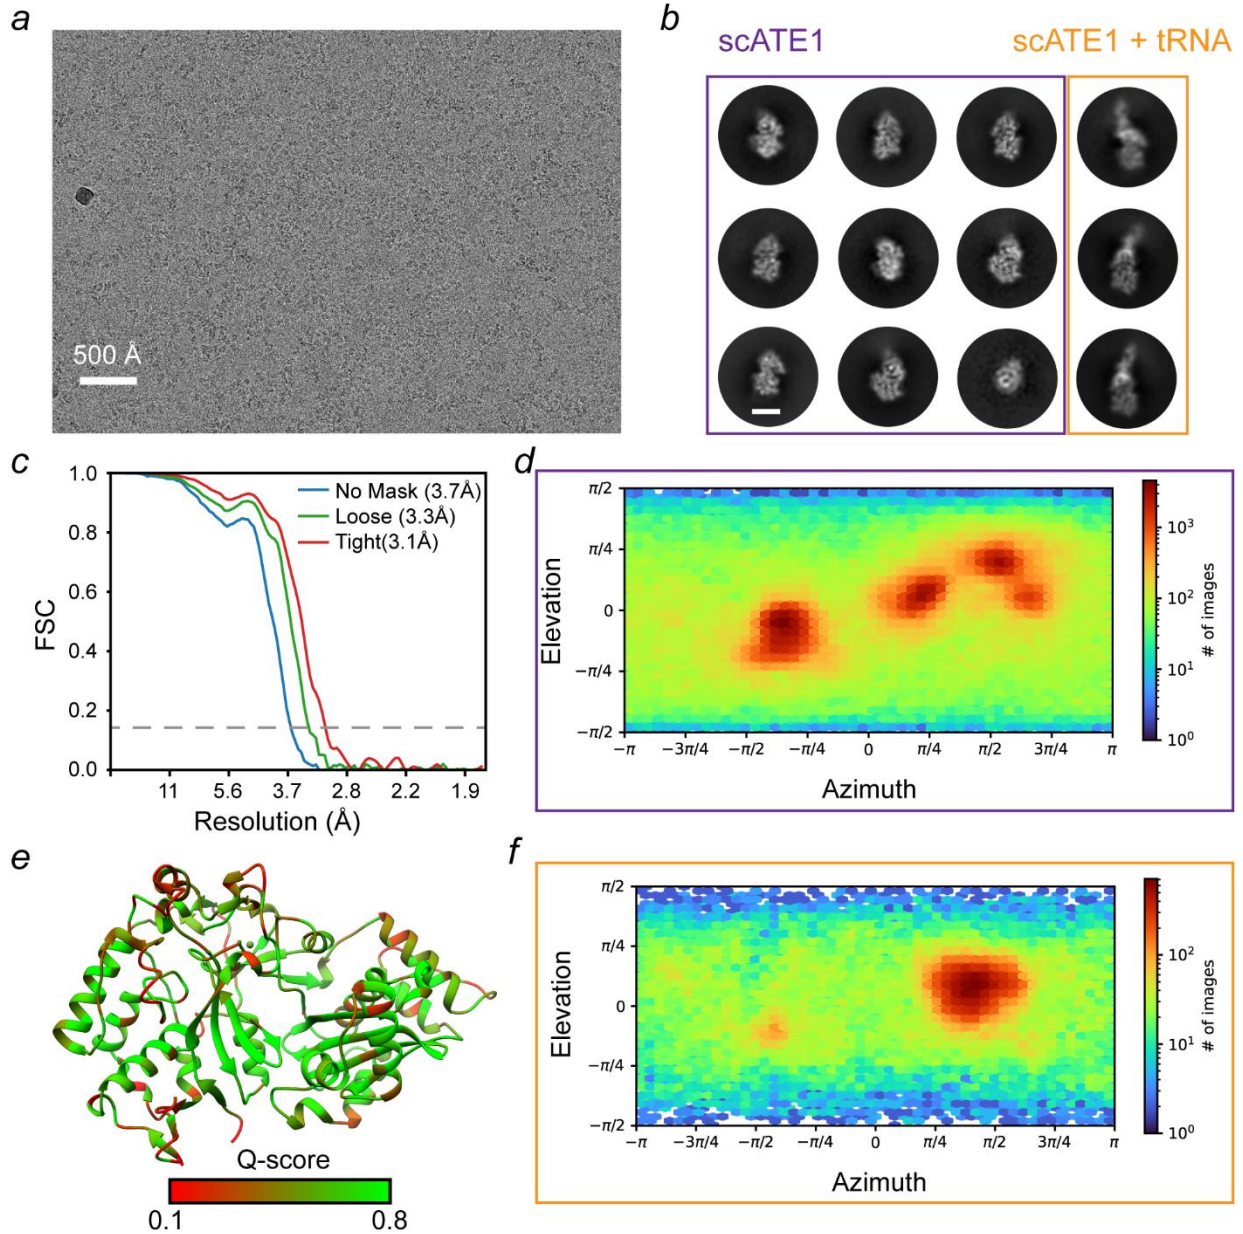

**Supplementary Figure 2. CryoEM image processing.** (a) A representative micrograph of scATE1 cryo-grids. The scale bar is 500 Å. (b) Representative 2D class averages. Apo scATE1 particles are highlighted in purple box and scATE1-tRNA particles are in orange box. The scale bar is 50 Å. (c) FSC curve for 3D reconstruction maps of apo scATE1. The grey dash line indicates the 0.143 FSC cutoff. (d) Angular distribution of apo scATE1 particle set. (e) Q-scores, representation of the resolvability of the structure model from the cryoEM map, of individual residues colored on scATE1 structure. Majority of residues, except these in the loop and on the protein surface, have a high Q-score. (f) Angular distribution of scATE1-tRNA particle set.

### Supplementary Figure 3

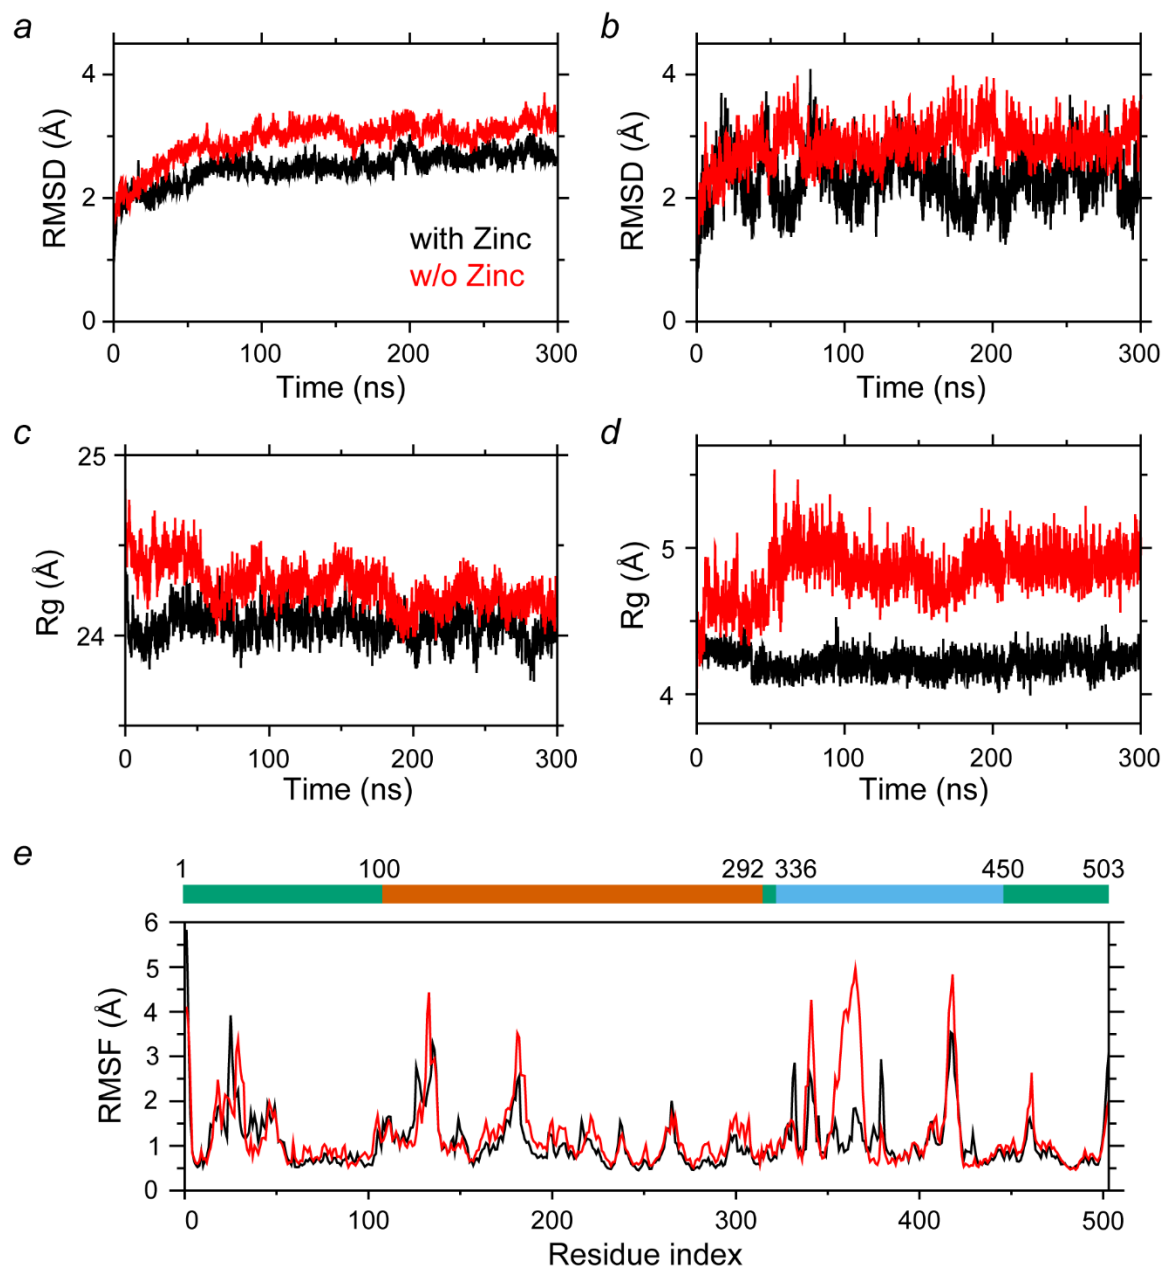

**Supplementary Figure 3. MD simulation of scATE1 with and without Zinc.** (a) Time evolution of root-mean-square-deviation (RMSD) for scATE1 with (black line) and without (red line) zinc with reference to the cryoEM structure. (b) Time evolution of RMSD for four cysteines (Cys 20, 23, 94 and 95) with (black line) and without (red line) zinc with reference to the cryoEM structure. (c) Radius of gyration of the whole scATE1 protein. (d) Radius of gyration of the four-cysteine cluster. (e) Root-mean-square-fluctuation (RMSF) of scATE1 with (black line) and without (red line) Zinc. Domain organization of scATE1 was plot on the top of the panel.

## Supplementary Figure 4

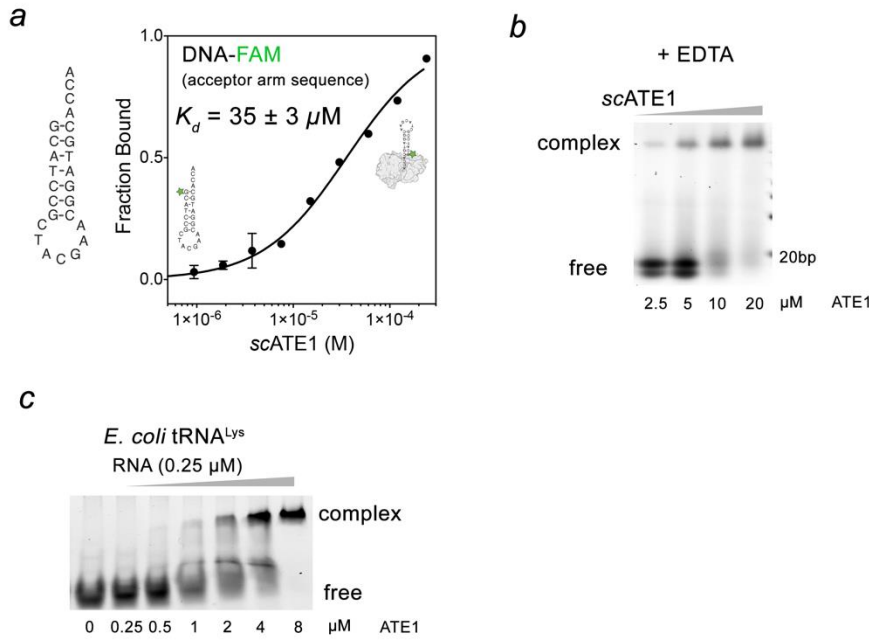

**Supplementary Figure 4. ATE1-ZnF is critical for RNA binding.** (a) Binding curves used to determine the  $K_d$  value of ATE1-DNA interaction in a direct binding assay by MST. Error bar represents s.d. in duplicate measurements. (b) EMSA visualization of ATE1 binding to synthesized RNA in the presence of 10 mM EDTA. ATE1 concentrations were shown below the gel. Two independent experiments were performed with similar results. (c) Representative EMSA assay of ATE1 binding to *in vitro* transcribed tRNA<sup>Lys</sup>. Three independent experiments were performed with similar results.

**Supplementary Table 1.** Data collection and refinement statistics for the scATE1.

|                                                 | scATE1                       | scATE1 + tRNA <sup>Arg</sup>  |
|-------------------------------------------------|------------------------------|-------------------------------|
| Microscope                                      |                              | Titan Krios                   |
| Voltage (keV)                                   |                              | 300                           |
| Image filter                                    |                              | BioQuantum                    |
| Slit width (eV)                                 |                              | 20                            |
| Super-resolution Pixel size (Å)                 |                              | 0.4363                        |
| Symmetry                                        |                              | C1                            |
| Dofocus range (micron)                          |                              | -0.5 to -2.5                  |
| Electron dose (e <sup>-</sup> /Å <sup>2</sup> ) |                              | 40                            |
| Micrographs                                     |                              | 13,455                        |
| Number of particles                             | 523,915                      | 208,051                       |
| Map resolution at 0.143 FSC (Å)                 | 3.1                          | 3.6                           |
| B-factor                                        | 152.7                        | 156                           |
| Model Refinement                                |                              |                               |
| Atom                                            | 4,072                        | 5711                          |
| Residues                                        | Protein: 503, Nucleotides: 0 | Protein: 503, Nucleotides: 77 |
| Ligands                                         | ZN: 1                        | ZN: 1                         |
| CCmask                                          | 0.79                         | 0.51                          |
| Resolution (FSC map vs. model at 0.5) (Å)       | 3.8                          | 4.1                           |
| r.m.s. deviations                               |                              |                               |
| Bond lengths (Å)                                | 0.003                        | 0.002                         |
| Bond angles (°)                                 | 0.594                        | 0.450                         |
| Clash score                                     | 8.81                         | 10.73                         |
| MolProbity score                                | 1.76                         | 2.49                          |
| PDB ID                                          | 8E3S                         | 8FZR                          |
| EMDB ID                                         | 27871                        | 29638                         |
